# Supplementary material
Source: Springer Nature journal article supplement (https://www.springermedizin.de/resource/supplementary/12963_2003_1_MOESM3_ESM.pdf/9572272)

% Population

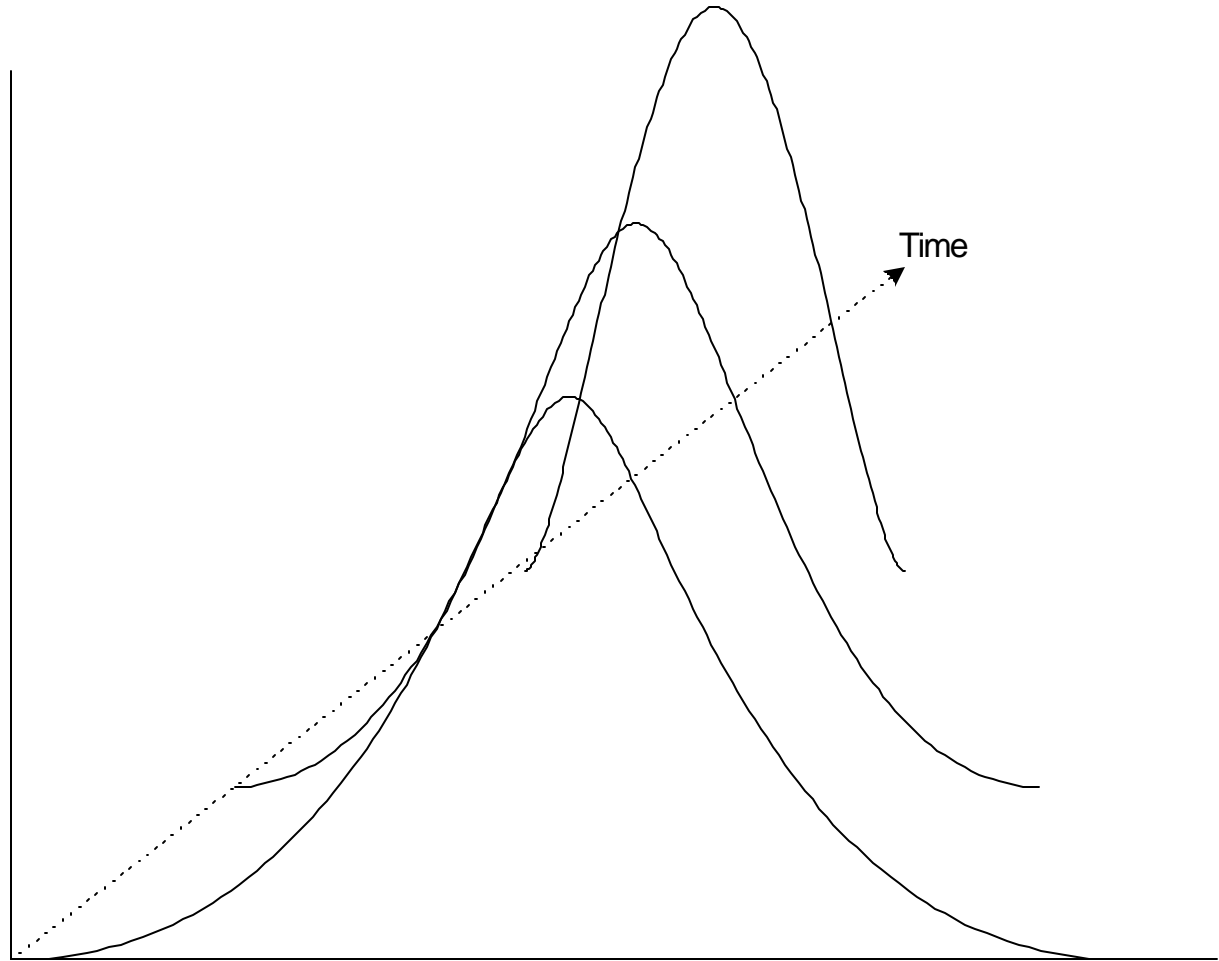

Time

Exposure

Supplement: MOESM3 [file 9572272]
